# Supplementary material
Source: PubMed Central journal article supplement (PMC4166763)
Supplement: tableS1.pdf [file tableS1.pdf]

Table S1. Gene expression levels using an mTOR gene array

| Gene Symbol | Sedentary |           | Exercise  |           |           |
|-------------|-----------|-----------|-----------|-----------|-----------|
|             | DOX       | (-)       | (+)       | (-)       | (+)       |
| Akt1        |           | 4.6±0.01  | 5.0±0.25  | 4.2±0.18  | 5.6±0.91  |
| Akt1s1      |           | 6.2±0.04  | 6.7±0.11  | 5.8±0.15  | 7.1±0.86  |
| Akt2        |           | 4.3±0.06  | 4.7±0.17  | 3.9±0.13  | 4.8±0.58  |
| Akt3        |           | 5.9±0.10  | 6.2±0.10  | 5.9±0.18  | 6.2±0.43  |
| Cab39       |           | 3.4±0.13  | 3.6±0.18  | 3.2±0.09  | 3.8±0.55  |
| Cab39l      |           | 5.7±0.05  | 5.8±0.13  | 5.5±0.11  | 5.7±0.22  |
| Cdc42       |           | 1.9±0.01  | 1.9±0.10  | 1.8±0.12  | 2.0±0.13  |
| Chuk        |           | 3.7±0.09  | 4.1±0.12  | 3.7±0.11  | 3.7±0.14  |
| Ddit4       |           | 4.3±0.04  | 5.3±0.17  | 4.7±0.19  | 6.0±0.32  |
| Ddit4l      |           | 10.0±0.09 | 10.0±0.12 | 9.8±0.15  | 9.7±0.33  |
| Deptor      |           | 8.7±0.13  | 9.0±0.15  | 8.3±0.16  | 9.2±0.73  |
| Eif4b       |           | 5.0±0.10  | 5.3±0.13  | 4.6±0.16  | 5.5±0.85  |
| Eif4e       |           | 2.2±0.05  | 2.3±0.12  | 1.9±0.12  | 2.3±0.21  |
| Eif4ebp1    |           | 3.8±0.10  | 4.0±0.07  | 3.9±0.16  | 3.6±0.07  |
| Eif43bp2    |           | 7.8±0.13  | 8.3±0.09  | 7.6±0.22  | 8.2±0.59  |
| Fkbp1a      |           | 3.6±0.09  | 3.9±0.17  | 3.3±0.11  | 4.2±0.55  |
| Fkbp8       |           | 4.4±0.09  | 4.6±0.14  | 4.1±0.10  | 4.9±0.68  |
| Gsk3b       |           | 5.2±0.00  | 5.5±0.12  | 5.0±0.14  | 5.7±0.51  |
| Hif1a       |           | 4.2±0.06  | 4.4±0.11  | 4.0±0.07  | 4.4±0.24  |
| Hras1       |           | 4.6±0.06  | 4.9±0.14  | 4.4±0.12  | 5.1±0.50  |
| Hspa4       |           | 3.4±0.12  | 3.7±0.12  | 3.3±0.11  | 3.9±0.47  |
| Igf1        |           | 6.3±0.15  | 6.7±0.07  | 6.5±0.19  | 6.7±0.12  |
| Igfbp3      |           | 4.4±0.08  | 4.8±0.10  | 4.6±0.10  | 4.1±0.13  |
| Ikbkb       |           | 8.1±0.14  | 8.4±0.23  | 7.6±0.16  | 8.8±0.91  |
| Ilk         |           | 4.2±0.11  | 4.6±0.12  | 4.2±0.11  | 4.5±0.14  |
| Ins2        |           | 14.1±0.15 | 15.1±0.59 | 13.7±0.06 | 14.8±0.34 |
| Insr        |           | 5.0±0.07  | 5.4±0.15  | 4.6±0.18  | 5.8±0.88  |
| Irs1        |           | 5.8±0.12  | 6.4±0.43  | 5.6±0.18  | 6.7±0.76  |
| Mapk1       |           | 3.2±0.10  | 3.4±0.10  | 2.9±0.13  | 3.7±0.60  |
| Mapk3       |           | 5.5±0.15  | 5.7±0.13  | 5.1±0.15  | 6.1±0.72  |
| Mapkap1     |           | 5.5±0.07  | 5.7±0.12  | 5.3±0.12  | 5.7±0.16  |
| Mlst8       |           | 8.0±0.09  | 8.2±0.09  | 7.5±0.08  | 8.3±0.51  |
| Mtor        |           | 6.6±0.09  | 7.1±0.14  | 6.4±0.12  | 7.4±0.68  |
| Myo1c       |           | 4.8±0.06  | 5.2±0.24  | 4.5±0.13  | 5.6±0.67  |
| Pdpk1       |           | 6.0±0.04  | 6.2±0.13  | 5.7±0.11  | 6.4±0.63  |
| Pik3c3      |           | 6.5±0.09  | 6.7±0.08  | 6.2±0.12  | 6.4±0.09  |

|         |           |           |           |           |
|---------|-----------|-----------|-----------|-----------|
| Pik3ca  | 5.2±0.09  | 5.4±0.07  | 4.9±0.14  | 5.5±0.45  |
| Pik3cb  | 8.4±0.19  | 8.5±0.04  | 8.1±0.14  | 8.9±0.55  |
| Pik3cd  | 9.9±0.12  | 9.9±0.11  | 9.7±0.15  | 10.5±0.64 |
| Pik3cg  | 10.4±0.17 | 10.4±0.16 | 10.2±0.39 | 11.1±0.82 |
| Pld1    | 8.2±0.08  | 8.1±0.12  | 7.8±0.14  | 8.3±0.71  |
| Pld2    | 8.7±0.10  | 9.2±0.10  | 8.4±0.17  | 9.6±0.78  |
| Ppp2ca  | 2.4±0.04  | 2.5±0.17  | 2.2±0.10  | 2.7±0.39  |
| Ppp2r2b | 13.8±0.44 | 14.4±0.36 | 15.3±0.92 | 13.5±0.23 |
| Ppp2r4  | 6.6±0.12  | 7.2±0.15  | 6.1±0.13  | 7.5±0.78  |
| Prkaa1  | 7.1±0.06  | 7.1±0.10  | 6.7±0.13  | 7.2±0.27  |
| Prkaa2  | 4.73±0.08 | 4.9±0.13  | 4.4±0.13  | 5.0±0.52  |
| Prkab1  | 6.3±0.06  | 6.7±0.13  | 6.1±0.03  | 6.9±0.49  |
| Prkab2  | 7.0±0.06  | 7.3±0.15  | 6.5±0.12  | 7.6±0.72  |
| Prkag1  | 6.9±0.09  | 7.4±0.09  | 6.6±0.22  | 7.6±0.42  |
| Prkag2  | 5.9±0.02  | 6.3±0.11  | 5.7±0.19  | 6.5±0.24  |
| Prkag3  | 10.7±0.16 | 11.2±0.34 | 10.5±0.11 | 11.2±0.92 |
| Prkca   | 5.8±0.05  | 6.0±0.06  | 5.5±0.10  | 6.4±0.66  |
| Prkcb   | 9.3±0.18  | 9.8±0.23  | 8.9±0.26  | 9.9±0.39  |
| Prkcc   | 10.4±0.12 | 11.3±0.12 | 10.3±0.03 | 11.4±0.73 |
| Prkce   | 6.8±0.09  | 7.3±0.27  | 6.5±0.16  | 7.7±0.79  |
| Pten    | 3.0±0.04  | 3.1±0.10  | 2.8±0.08  | 3.2±0.34  |
| Rheb    | 4.3±0.06  | 4.3±0.15  | 4.0±0.12  | 4.4±0.20  |
| Rhoa    | 1.6±0.07  | 1.8±0.11  | 1.4±0.12  | 1.9±0.37  |
| Rictor  | 7.3±0.07  | 7.5±0.12  | 7.0±0.16  | 7.8±0.70  |
| Rps6    | 0.6±0.08  | 0.3±0.15  | 0.5±0.09  | 0.7±0.22  |
| Rps6ka1 | 9.2±0.12  | 9.6±0.19  | 8.8±0.15  | 10.0±0.68 |
| Rps6ka2 | 7.2±0.06  | 7.9±0.20  | 6.9±0.13  | 8.0±0.72  |
| Rps6ka5 | 8.3±0.11  | 8.6±0.07  | 7.9±0.17  | 8.7±0.57  |
| Rps6kb1 | 4.9±0.02  | 5.1±0.14  | 4.9±0.18  | 5.3±0.37  |
| Rps6kb2 | 8.6±0.05  | 9.2±0.13  | 8.4±0.15  | 9.5±0.77  |
| Rptor   | 6.9±0.05  | 7.5±0.16  | 6.7±0.20  | 7.8±0.78  |
| Rraga   | 4.8±0.07  | 4.7±0.09  | 4.4±0.11  | 5.1±0.55  |
| Rragb   | 8.7±0.07  | 9.0±0.03  | 8.4±0.03  | 8.9±0.17  |
| Rragc   | 4.9±0.05  | 5.2±0.16  | 4.5±0.15  | 5.4±0.53  |
| Rragd   | 4.9±0.09  | 5.2±0.16  | 4.4±0.10  | 5.2±0.44  |
| Sgk1    | 3.3±0.11  | 3.9±0.43  | 3.4±0.23  | 4.4±0.17  |
| Stk11   | 4.3±0.02  | 4.8±0.17  | 4.2±0.17  | 4.9±0.50  |
| Stradb  | 5.0±0.11  | 5.1±0.11  | 4.8±0.14  | 5.0±0.12  |
| Telo2   | 10.7±0.21 | 11.3±0.17 | 10.6±0.16 | 11.6±0.60 |

|       |           |           |           |           |
|-------|-----------|-----------|-----------|-----------|
| Trp53 | 8.5±0.20  | 8.7±0.07  | 8.1±0.16  | 9.0±0.40  |
| Tsc1  | 9.4±0.02  | 9.6±0.20  | 8.9±0.18  | 9.9±0.86  |
| Tsc2  | 4.8±0.02  | 5.3±0.12  | 5.0±0.15  | 4.8±0.16  |
| Ulk1  | 6.1±0.01  | 6.5±0.24  | 5.7±0.16  | 6.9±0.94  |
| Ulk2  | 5.0±0.06  | 5.4±0.12  | 4.8±0.20  | 5.5±0.65  |
| Vegfa | 3.5±0.08  | 3.9±0.30  | 3.2±0.03  | 4.2±0.51  |
| Vegfb | 3.0±0.04  | 3.4±0.13  | 2.6±0.04  | 3.9±0.76  |
| Vegfc | 9.8±0.14  | 10.1±0.18 | 9.5±0.25  | 10.5±0.63 |
| Ywhaq | 11.7±0.07 | 12.2±0.10 | 11.3±0.14 | 12.7±0.62 |
| Actb  | 0.91±0.11 | 1.32±0.25 | 0.60±0.18 | 1.99±0.67 |

Cardiomyocytes were used for analysis of gene expression in an mTOR gene array.

Akt1, thymoma viral proto-oncogene 1; Akt1s1, AKT1 substrate 1; Akt2, thymoma viral proto-oncogene 2; Akt3, thymoma viral proto-oncogene 3; Cab39, calcium binding protein 39; Cab39l, calcium binding protein 39-like; Cdc42, cell division cycle 42; Chuk, conserved helix-loop-helix ubiquitous kinase; Ddit4, DNA-damage-inducible transcript 4; Ddit4l, DNA-damage-inducible transcript 4-like; Deptor, DEP domain containing MTOR-interacting protein; Eif4b, eukaryotic translation initiation factor 4B; Eif4e, eukaryotic translation initiation factor 4E; Eif4ebp1, eukaryotic translation initiation factor 4E binding protein 1; Eif4ebp2, eukaryotic translation initiation factor 4E binding protein 2; Fkbp1a, FK506 binding protein 1a; Fkbp8, FK506 binding protein 8; Gsk3b, glycogen synthase kinase 3 beta; Hif1a, hypoxia inducible factor 1, alpha subunit; Hras1, Harvey rat sarcoma virus oncogene 1; Hspa4, heat shock protein 4; Igf1, insulin-like growth factor 1; insulin-like growth factor binding protein 3; Ikbkb, inhibitor of kappaB kinase beta; Ilk, Integrin-linked kinase; Ins2, Insulin 2; Insr, insulin receptor; Irs1, insulin receptor substrate 1; Mapk1, mitogen-activated protein kinase 1; Mapk3, mitogen-activated protein kinase 3; Mapkap1, Mitogen-activated protein kinase associated protein; Mlst8, MTOR associated protein, LST8 homolog; Mtor, mechanistic target of rapamycin; Myo1c myosin IC; Pdpk1, 3-phosphoinositide dependent protein kinase 1; Pik3c3, phosphoinositide-3-kinase, class3; Pik3ca, phosphatidylinositol 3-kinase, catalytic, alpha polypeptide; Pik3cb, phosphatidylinositol 3-kinase, catalytic, beta polypeptide; Pik3cd, phosphatidylinositol 3-kinase, catalytic, delta polypeptide; Pik3cg, phosphatidylinositol 3-kinase, catalytic, gamma polypeptide; Pld1, phospholipase D1; Pld2, phospholipase D2; Ppp2ca, protein phosphatase 2 (formerly 2A), catalytic subunit, alpha isoform; Ppp2r2b, protein phosphatase 2, regulatory subunit B, beta; Ppp2r4, protein phosphatase 2A activator, regulatory subunit B; Prkaa1, protein kinase, AMP-activated, alpha 1 catalytic subunit; Prkaa2, protein kinase, AMP-activated, alpha 2 catalytic subunit; Prkab1, protein kinase, AMP-activated, beta 1 non-catalytic subunit; Prkab2, protein kinase, AMP-activated, beta 2 non-catalytic subunit; Prkag1, Protein kinase, AMP-activated, Gamma 1 non-catalytic subunit; Prkag2, Protein kinase, AMP-activated, Gamma 2 non-catalytic subunit; Prkag3, Protein kinase, AMP-activated, Gamma 3 non-catalytic subunit; Prkca, protein kinase C, alpha; Prkcb, protein kinase C, beta; Prkcc, protein kinase C, gamma; Prkce, protein kinase C, epsilon; Pten, phosphatase and tensin homolog; Rheb, Ras homolog enriched in brain; Rhoa, ras homolog gene family, member A; Rictor, RPTOR independent companion of MTOR, complex 2; Rps6, ribosomal protein S6; Rps6ka1, ribosomal protein S6 kinase polypeptide 1; Rps6ka2, ribosomal protein S6 kinase polypeptide

2; Rps6ka5, ribosomal protein S6 kinase, polypeptide 5; Rps6kb1, ribosomal protein S6 kinase polypeptide 1; Rps6kb2, ribosomal protein S6 kinase polypeptide 2; Rptor, regulatory associated protein of MTOR, complex 1; Rraga, Ras-related GTP binding A; Rragb, Ras-related GTP binding B; Rragc, Ras-related GTP binding C; Rragd, Ras-related GTP binding D; Sgk1, Serum/glucocorticoid regulated kinase 1; Stk11, serine/threonine kinase 11; Stradb, STE20-related kinase adaptor beta; Telo2, TEL2, telomere maintenance 2; Trp53, transformation related protein 53; Tsc1, Tuberous sclerosis 1; Tsc2, Tuberous sclerosis 2; Ulk1, unc-51 like kinase 1; Ulk2, unc-51 like kinase 1; Vegfa, vascular endothelial growth factor A; Vegfb, vascular endothelial growth factor B; Vegfc, vascular endothelial growth factor C; Ywhaq, Tyrosine 3-monooxygenase/tryptophan 5-monooxygenase activation protein, theta polypeptide; Actb, actin, beta.
